# Supplementary material for: Association between Body Mass Index and Sensory Processing in Childhood: InProS Study
Source: MDPI journal article supplement (doi:10.3390/nu12123684), 2020-11-29
Supplement: s1 [file s1]

**Table S1.** Summary of the Short Sensory Profile items\*

| Item | Tactile sensitivity                                                                                                                  |
|------|--------------------------------------------------------------------------------------------------------------------------------------|
| 1    | Expresses distress during grooming (for example, fights or cries during haircutting, face washing, fingernail cutting)               |
| 2    | Prefers long-sleeved clothing when it is warm or short sleeves when it is cold                                                       |
| 3    | Avoids going barefoot, especially in sand or grass                                                                                   |
| 4    | Reacts emotionally or aggressively to touch                                                                                          |
| 5    | Withdraws from splashing water                                                                                                       |
| 6    | Has difficulty standing in line or close to other people                                                                             |
| 7    | Rubs or scratches out a spot that been touched                                                                                       |
| Item | Taste/smell sensitivity                                                                                                              |
| 8    | Avoids certain tastes of food smells that are typically part of children's diets                                                     |
| 9    | Will only eat certain tastes                                                                                                         |
| 10   | Limits self to particular food textures/temperatures                                                                                 |
| 11   | Picky eater, especially regarding food textures                                                                                      |
| Item | Movement sensitivity                                                                                                                 |
| 12   | Becomes anxious or distressed when feet leave the ground                                                                             |
| 13   | Fears falling or heights                                                                                                             |
| 14   | Dislikes activities where head is upside down (for example, somersaults, roughhousing)                                               |
| Item | Underresponsive/seeking sensation                                                                                                    |
| 15   | Enjoys strange noises/seeking to make noise for noise's sake                                                                         |
| 16   | Seeks all kinds of movement and this interferes with daily routines (for example, can't sit still, fidgets)                          |
| 17   | Becomes overly excitable during movement activity                                                                                    |
| 18   | Touches people and objects                                                                                                           |
| 19   | Doesn't seem to notice when face or hands are messy                                                                                  |
| 20   | Jumps from one activity to another so that it interferes with play                                                                   |
| 21   | Leaves clothing twisted on body                                                                                                      |
| Item | Auditory Filtering                                                                                                                   |
| 22   | Is distracted or has trouble functioning if there is a lot of noise around                                                           |
| 23   | Appears to not hear what you say (for example, does not "tune-in" to what you say, appears to ignore you)                            |
| 24   | Can't work with background noise (for example, fan, refrigerator)                                                                    |
| 25   | Has trouble completing tasks when the radio is on                                                                                    |
| 26   | Doesn't respond when name is called but you know the child's hearing is OK                                                           |
| 27   | Has difficulty paying attention                                                                                                      |
| Item | Low energy/weak                                                                                                                      |
| 28   | Seems to have weak muscles                                                                                                           |
| 29   | Tires easily, especially when standing or holding particular body position                                                           |
| 30   | Has a weak grasp                                                                                                                     |
| 31   | Can't lift heavy objects (for example, weak in comparison to same age children)                                                      |
| 32   | Props to support self (even during activity)                                                                                         |
| 33   | Poor endurance/tires easily                                                                                                          |
| Item | Visual/auditory sensitivity                                                                                                          |
| 34   | Responds negatively to unexpected or loud noises (for example, cries or hides at noise from vacuum cleaner, dog barking, hair dryer) |
| 35   | Holds hands over ears to protect ears from sound                                                                                     |
| 36   | Is bothered by bright lights after others have adapted to the light                                                                  |

37 Watches everyone when they move around the room

38 Covers eyes or squints to protect eyes from light

---

\*Rating scale ranged from 1 to 5: 1=always; 2=frequently; 3=occasionally; 4=seldom; 5=never.
